# Supplementary material
Source: publisher figshare collection journal article supplement (https://acs.figshare.com/ndownloader/files/3880879)
Supplement: Supplementary file 1 [file 3880879]

**Strong metal-support interaction in Pt/TiO<sub>2</sub> induced by mild  
HCHO and NaBH<sub>4</sub> solution reduction and its effect on catalytic  
toluene combustion**

Zebao Rui, Lingye Chen, Huayao Chen, Hongbing Ji<sup>\*</sup>

*Department of Chemical Engineering, School of Chemistry & Chemical Engineering,  
and The Key Lab of Low-carbon Chem & Energy Conservation of Guangdong  
Province, Sun Yat-Sen University, Guangzhou 510275, P.R. China*

---

<sup>\*</sup> Corresponding author. Tel.: +86 20 84113658. E-mail address: jihb@mail.sysu.edu.cn (H. Ji).

In this work, the Weisz-Prater Criterion (Eq.S1) was used to estimate the influence of pore diffusion on reaction rates. It is particularly useful because it provides a dimensionless number containing only observable parameters that can be readily measured or calculated.<sup>1, 2</sup>

$$N_{w-p} = \frac{\Re R_p^2}{C_s D_{eff}} \quad (S1)$$

Here,  $\Re$  is the reaction rate per volume of catalyst, which can be calculated from the molar flow rate and conversion of toluene at a given temperature, and the mass ( $2 \times 10^{-4}$  kg) and density ( $188.7 \text{ kg/m}^3$ ) of the packed catalyst.  $R_p$  is the catalyst particle radius, which has a largest value of  $R_p = 2.25 \times 10^{-4}$  m due to the mesh screen.  $C_s$  is the reactant concentration at the particle surface. As the catalyst used in this study is in the form of a fine powder ( $R_p \leq 225 \text{ }\mu\text{m}$ ), it may be assumed that external diffusion is not effective in the reaction, and

$$C_s \cong C_0 = \frac{P_{0,C_7H_8}}{RT} \quad (S2)$$

The effective diffusivity  $D_{eff}$  is related to the mean free path ( $\lambda$ , m) and the mean velocity ( $\bar{v}$ , m<sup>2</sup>/s) of the gas phase toluene. Here,

$$\bar{v} = \left( \frac{8RT}{\pi M} \right)^{1/2} \quad (S3)$$

$$\lambda = \frac{k_B T}{\sqrt{2} \pi d^2 P_{C_7H_8}} \quad (S4)$$

where  $k_B$  is the Boltzmann constant in J/K,  $P_{C_7H_8}$  is partial pressure of toluene in Pa,  $d$  is the diameter of toluene in meters, and  $M$  is the molar mass of toluene in kg/mol. Use of the initial toluene  $P_{0,C_7H_8}$  and  $T = 473.15$  K, the calculated  $\lambda = 1.08 \times 10^5$  nm is much larger than the pore sizes of the catalysts ( $d_p$ , 11.0~22.8 nm). Consequently, pore diffusion will be dominated by Knudsen diffusion and

$$D_{eff} \cong D_{Kn} = \bar{v} \frac{d_p}{3} \quad (S5)$$

where  $D_{Kn}$  is the Knudsen diffusivity.<sup>2</sup>

## References

- (1) Weisz, P.B.; Prater, C.D. Interpretation of measurements in experimental catalysis.  
*Adv. Catal.* **1954**, *6*, 143-196.
- (2) Vannice, M.A.; Joyce, W.H. *Kinetics of Catalytic Reactions*. New York: Springer,  
**2005**, *134*, 63-65.
